# Supplementary material for: 信州大学繊維学部-西松・金井研究室 : 繊維製品の「快適性(心地)」を数値化
Source: PLOS journal article supplement (doi:10.1371/journal.pone.0206862), 2009-05-25
Supplement: S2 (10.1371/journal.pone.0206862.s002) [file journal.pone.0206862.s002]

**S2 Table: Proportions of missing data**

| Variable                                                 | Missing data /% |
|----------------------------------------------------------|-----------------|
| VasopressinTotal                                         | 99.25*          |
| AdrenalineTotal                                          | 99.04*          |
| NoradrenalineTotal                                       | 77.28*          |
| Pa <sub>O<sub>2</sub></sub> /Fi <sub>O<sub>2</sub></sub> | 51.41           |
| Age                                                      | 41.03           |
| CRP                                                      | 34.68           |
| PH                                                       | 34.05           |
| Lactate                                                  | 31.96           |
| Creatinine                                               | 31.46           |
| HR                                                       | 22.93           |
| Sodium                                                   | 18.71           |
| Potassium                                                | 18.59           |
| MAP                                                      | 11.88           |
| APACHE-II score                                          | 6.30            |
| Sex                                                      | 0.00            |
| Duration of admission                                    | 0.00            |
| Ventilated                                               | 0.00            |
| Vital status at discharge                                | 0.00            |

Percentage of missing data for each variable after outliers have been removed. Values marked with \* assumed to be missing-not-at-random, with missing values representing values of zero. Otherwise, missing data was assumed to be missing-at-random and subsequently imputed.
